# Supplementary material for: Administration of Adipose Derived Mesenchymal Stem Cells and Platelet Lysate in Erectile Dysfunction: A Single Center Pilot Study
Source: PubMed Central journal article supplement (PMC6466012; doi:10.3390/bioengineering6010021), 2019-03-05
Supplement: bioengineering-06-00021-s001.pdf [file bioengineering-06-00021-s001.pdf]

**Table S1.** Patient's age and comorbidities.

|         | <b>Patient No</b> | <b>Age</b> | <b>Comorbidities</b>                         |
|---------|-------------------|------------|----------------------------------------------|
| Group A | 1                 | 62         | Hypertension, Hypercholesterolemia           |
|         | 2                 | 52         | Diabetes, Hypercholesterolemia               |
|         | 3                 | 52         | Diabetes, Hypertension                       |
|         | 4                 | 66         | Peyronie's Disease                           |
|         | 5                 | 52         | Diabetes, Hypertension, Hypercholesterolemia |
| Group B | 6                 | 39         | Peyronie's Disease                           |
|         | 7                 | 39         | Peyronie's Disease                           |
|         | 8                 | 33         | Hypertension                                 |

**Table S2.** Hormonal and metabolic evaluation of all patients.

| Parameters                      | Group A   |           |           |           |           |           | Group B   |           |
|---------------------------------|-----------|-----------|-----------|-----------|-----------|-----------|-----------|-----------|
|                                 | Patient 1 | Patient 2 | Patient 3 | Patient 4 | Patient 5 | Patient 6 | Patient 7 | Patient 8 |
| <b>LH</b><br>(mIU/ml)           | 4.8       | 4.8       | 5.8       | 6.3       | 3         | 3.4       | 4.5       | 2.3       |
| <b>FSH</b><br>(mIU/ml)          | 4.8       | 6.1       | 10.6      | 5.3       | 6.1       | 5.1       | 6.3       | 6.6       |
| <b>PRL</b><br>(ng/ml)           | 7.2       | 8         | 8.2       | 13.1      | 5.6       | 8.3       | 9.1       | 14        |
| <b>FT3</b><br>(pg/ml)           | 2.4       | 2.5       | 2.9       | 2.7       | 2.8       | 2.9       | 2.8       | 2.2       |
| <b>FT4</b><br>(ng/dl)           | 1.1       | 0.9       | 1.2       | 1.4       | 1         | 0.9       | 1.2       | 1.2       |
| <b>TSH</b><br>( $\mu$ IU/ml)    | 2.2       | 1.9       | 2.2       | 0.6       | 1.9       | 2.5       | 3.1       | 0.7       |
| <b>CEA</b><br>(IU/ml)           | 1.1       | 0.8       | 0.9       | 1.2       | 1.6       | 1.7       | 1.8       | 1.7       |
| <b>CA 19-9</b><br>(IU/ml)       | 9.1       | 9.1       | 7.8       | 10.1      | 11.1      | 9.5       | 7.2       | 7.8       |
| <b>aFP</b><br>(ng/ml_           | 1.8       | 2.1       | 1.1       | 1.7       | 2.1       | 1         | 1.6       | 1.7       |
| <b>PSA</b><br>(ng/ml)           | 0.4       | 0.3       | 0.9       | 0.9       | 0.4       | 0.9       | 0.8       | 1.3       |
| <b>Glucose</b><br>(mg/dl)       | 98        | 91        | 269       | 114       | 191       | 191       | 88        | 95        |
| <b>Cholesterol</b><br>(mg/dl)   | 180       | 140       | 171       | 210       | 151       | 169       | 172       | 168       |
| <b>Triglycerides</b><br>(mg/dl) | 323       | 175       | 242       | 126       | 59        | 89        | 122       | 85        |
| <b>Testosterone</b><br>(nmol/L) | 5.9       | 6.6       | 2.9       | 4.9       | 5.5       | 3.1       | 3.4       | 9.5       |
| <b>Estradiol</b><br>(mg/dl)     | 53.1      | 35.2      | 31.5      | 45.1      | 37.5      | 25.4      | 22.5      | 11.5      |

**Table S3.** Patients' medication before the administration of ADMSCs with PL or PL

| Patient | Erectile Function before therapy | Erectile function 1 <sup>st</sup> month | Erectile function 3 <sup>rd</sup> month             |                                                       |
|---------|----------------------------------|-----------------------------------------|-----------------------------------------------------|-------------------------------------------------------|
| Group A | 1                                | Only with ICI, unable to climax         | Hard erections with oral PDE5-I, normal ejaculation | Hard erections with oral PDE5-I, normal ejaculation   |
|         | 2                                | No erections                            | Some increase in hardness                           | Hard erections with oral PDE5-I                       |
|         | 3                                | Moderate erections with ICI             | Improvement only in morning erections               | Hard erections with oral PDE5-I                       |
|         | 4                                | Moderate erections with ICI             | Hard erections with oral PDE5-I                     | Unassisted hard erections                             |
|         | 5                                | Hard erections only with ICI            | Unassisted hard erections short duration            | Unassisted hard erections                             |
| Group B | 6                                | Hard erections with PDE5i               | Unassisted hard erections on 70% of intercourses    | Unassisted hard erections in 70% of intercourses      |
|         | 7                                | Moderate erections with PDE5i           | Improvement-still on PDE5i                          | Stable                                                |
|         | 8                                | Hard erections only with ICI            | Unassisted hard erections of short duration         | Good Unassisted hard erections in 30% of intercourses |

**Table S4.** Number of administrated ADMSCs to each patient

| Patient No | Tissue Specimen | Number of injected ADMSCs (x 10 <sup>6</sup> cells) | Volume of PRP (ml) | Total PLTs (x 10 <sup>6</sup> ) |      |
|------------|-----------------|-----------------------------------------------------|--------------------|---------------------------------|------|
| Group A    | 1               | Lipoaspiration, 20 ml                               | 9.5                | 2                               | 1600 |
|            | 2               | Lipoaspiration, 50 ml                               | 43.2               | 2                               | 1700 |
|            | 3               | Lipoaspiration, 100 ml                              | 37.2               | 2                               | 1728 |
|            | 4               | Lipoaspiration, 50 ml                               | 53.2               | 2                               | 1660 |
|            | 5               | Lipoaspiration, 100 ml                              | 51.4               | 3                               | 1850 |
| Group B    | 6               | -                                                   | -                  | 2                               | 1750 |
|            | 7               | -                                                   | -                  | 3                               | 1610 |
|            | 8               | -                                                   | -                  | 2                               | 1720 |
